# Supplementary material
Source: publisher figshare collection journal article supplement (https://frontiersin.figshare.com/ndownloader/files/21935502)
Supplement: Supplementary file [file 21935502]

## Supplementary Material

**Table S1.** Primers for detection of *ADAM* family member expression in HBMECs

| Target gene   | Amplicon length (bp) | Primer sequence, 5'-3', forward, reverse      | Nucleotide position        | Genbank accession No. |
|---------------|----------------------|-----------------------------------------------|----------------------------|-----------------------|
| <i>ADAM9</i>  | 140                  | TGTGTCTCCTAGTAGCTTCCT<br>CCATTGTGCACACTTTGGCA | 3856 - 3876<br>3995 - 3976 | NM_003816             |
| <i>ADAM10</i> | 200                  | TTCCCACAAGGCAGTGTTTT<br>TCCACCAAGACAAGCACTGAA | 4621 - 4640<br>4820 - 4800 | NM_001110             |
| <i>ADAM17</i> | 138                  | TTTGGTAACGCCACCTGCAC<br>CGGAAAACCTGCTCACATCGG | 31 - 50<br>168 - 149       | NM_003183             |

**Table S2.** Primers for plasmid construction of truncated *ADAM9* promoter

| Amplified fragments | Primer sequence,<br>5'-3', forward, reverse | Clone vector |
|---------------------|---------------------------------------------|--------------|
| ADAM9 (-2078—0)     | CCGCTCGAGAATGTCTGAATGCTATTACATA             | pGL3         |
|                     | CAAGCTTCTCGGCCGTCCGCAGGTT                   |              |
| ADAM9 (-571—0)      | CCGCTCGAGAATGTCTGAATGCTATTACATA             | pGL3         |
| ADAM9 (-859—0)      | CCGCTCGAGAATGTCTGAATGCTATTACATA             | pGL3         |
|                     | CCAAGCTTGCCTACAAGGCATCTTTTAAAAAA            |              |
| ADAM9 (-1144—0)     | CCGCTCGAGAATGTCTGAATGCTATTACATA             | pGL3         |
| ADAM9 (-2078—-1144) | CCTCGAGGAGACAAGTCATTTACTCCATTT              | pGL3         |
|                     | CAAGCTTCTCGGCCGTCCGCAGGTT                   |              |
| ADAM9 (-859—-571)   | CCG CTCGAG ACTGAAGCACAGCAGGTCAAA            | pGL3         |
|                     | CC AAGCTT TTAATTGGCTTGGAAAGGG               |              |

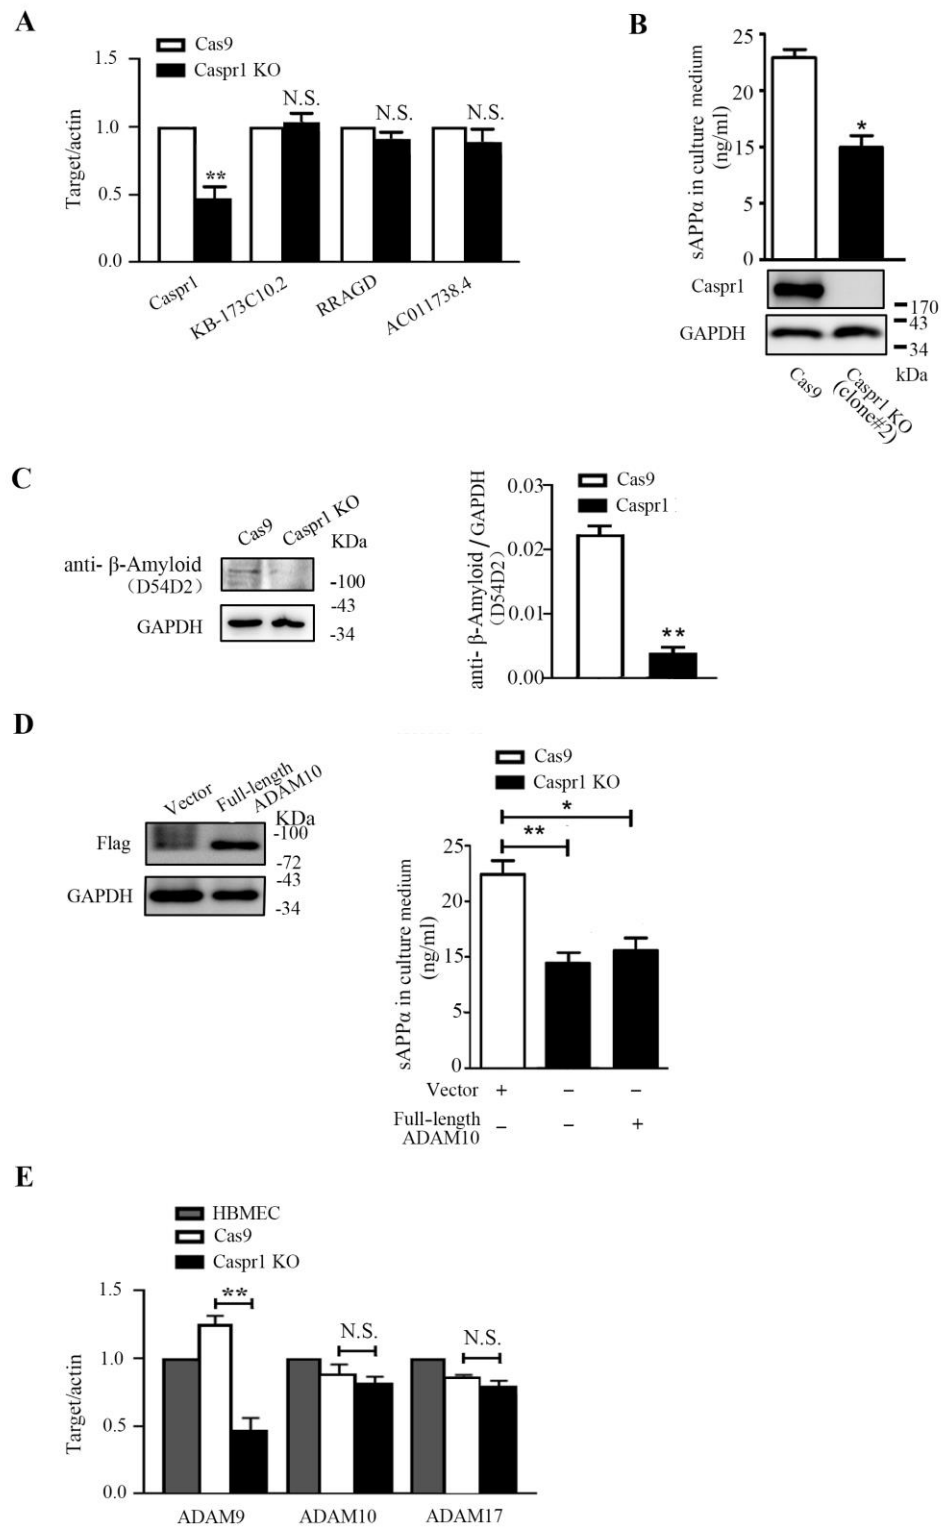

**Figure S1.** Caspr1 depletion reduced sAPPα production with downregulated ADAM9 in brain endothelial cells

(A) The total RNA of HBMECs with Caspr1 knockout was extracted and reverse transcribed using Moloney murine leukemia virus (M-MLV) reverse transcriptase. Then Real-time PCR was

performed to detect the mRNA expression levels of Caspr1, KB-173C10.2, RRAGD and AC011738.4 genes, with actin as an internal control. Data are normalized to Cas9 control which was defined as 1. Values are mean  $\pm$  SD from three independent experiments. \*\*,  $p < 0.01$ , Student's t-test. N.S., no statistical significance.

- (B) Another single cell clone of HBMECs with Caspr1 knockout by CRISPR-Cas9 technique was obtained and the knockout effect was verified by Western blot (bottom panel). Then the secreted sAPP $\alpha$  in the culture medium of Caspr1-depleted HBMECs (Caspr1 KO) was determined by ELISA assays (top panel). The empty vector (Cas9) was used as a control. All values are presented as mean  $\pm$  SD for three independent experiments. \*,  $p < 0.05$ , Student's t-test.
- (C) The expression of sAPP $\alpha$  (~110 kDa) in Caspr1-depleted HBMECs (Caspr1 KO) was detected by anti- $\beta$ -Amyloid (D54D2) recognizing the C-terminal of sAPP $\alpha$ . The GAPDH was served as loading control. The representative images were from three independent experiments. For quantification, the protein band intensities of the Western blot images were quantified with ImageJ software (National Institutes of Health, Bethesda, MD). The relative protein expression levels were calculated by normalization with the respective GAPDH bands. Data are presented as mean  $\pm$  SD for three independent experiments. \*\*,  $p < 0.01$ , Student's t-test.
- (D) Caspr1-knockout HBMECs were transfected with the construct containing flag-tagged full-length ADAM10 cDNA, with the empty vector as control. After 48 hr, the expression of ADAM10 was determined by Western blot using anti-flag antibody. The concentrations of sAPP $\alpha$  in the medium of the cells were measured by ELISA. \*,  $p < 0.05$ , \*\*,  $p < 0.01$ , Student's t-test.
- (E) The total RNA of HBMECs with Caspr1 knockout was extracted and reverse transcribed using M-MLV reverse transcriptase. Then Real-time PCR was performed to detect the mRNA levels of ADAM9, ADAM10 and ADAM17, with actin as an internal control. Data are normalized to HBMECs which was defined as 1. Values are mean  $\pm$  SD from three independent experiments. \*\*,  $p < 0.01$ , Student's t-test. N.S., no statistical significance. The primer sequence of actin was 5'-TGATCTTGATCTTCATTGTG-3' (forward) and 5'-GTTGCTATCCAGGCTGTG-3' (reverse).
